1 **Schizophrenia risk from locus-specific human endogenous retroviruses**

2

3 Rodrigo R.R. Duarte<sup>a,c</sup>, Matthew L. Bendall<sup>c,d</sup>, Miguel de Mulder<sup>c</sup>, Christopher E. Ormsby<sup>e</sup>, Greta A.  
4 Beckerle<sup>c</sup>, Sashika Selvackadunco<sup>f</sup>, Claire Troakes<sup>f</sup>, Gustavo Reyes-Terán<sup>e</sup>, Keith A. Crandall<sup>d</sup>,  
5 Deepak P. Srivastava<sup>†b,g</sup>, Douglas F. Nixon<sup>†c</sup> and Timothy R. Powell<sup>\*†a,c</sup>

6 † Shared senior authors.

7

8 <sup>a</sup> Social, Genetic & Developmental Psychiatry Centre, Institute of Psychiatry, Psychology &  
9 Neuroscience, King's College London, London, UK.

10 <sup>b</sup> Department of Basic & Clinical Neuroscience, Institute of Psychiatry, Psychology & Neuroscience,  
11 King's College London, London, UK.

12 <sup>c</sup> Division of Infectious Diseases, Weill Cornell Medicine, Cornell University, New York, NY, USA.

13 <sup>d</sup> Computational Biology Institute, Milken Institute School of Public Health, The George Washington  
14 University, Washington, DC, USA.

15 <sup>e</sup> Center for Research in Infectious Diseases, National Institute of Respiratory Diseases, Mexico City,  
16 Mexico.

17 <sup>f</sup> MRC London Neurodegenerative Diseases Brain Bank, Institute of Psychiatry, Psychology &  
18 Neuroscience, King's College London, London, United Kingdom.

19 <sup>g</sup> MRC Centre for Neurodevelopmental Disorders, King's College London, London, United Kingdom.

20

21 \* Correspondence to: Dr. Timothy R. Powell, Social, Genetic & Developmental Psychiatry Centre,  
22 Institute of Psychiatry, Psychology & Neuroscience, King's College London, 16 De Crespigny Park,  
23 London SE5 8AF, United Kingdom. E-mail: [timothy.1.powell@kcl.ac.uk](mailto:timothy.1.powell@kcl.ac.uk). Tel: +44 (0)20 7848 5361.

24 **Abstract**

25 Schizophrenia genome-wide association studies highlight the substantial contribution of risk  
26 attributed to the non-coding genome where human endogenous retroviruses (HERVs) are encoded.  
27 These ancient viral elements have previously been overlooked in genetic and transcriptomic studies  
28 due to their poor annotation and repetitive nature. Using a new, comprehensive HERV annotation,  
29 we found that the fraction of the genome where HERVs are located (the 'retrogenome') is enriched  
30 for schizophrenia risk variants, and that there are 148 disparate HERVs involved in susceptibility.  
31 Analysis of RNA-sequencing data from the dorsolateral prefrontal cortex of 259 schizophrenia cases  
32 and 279 controls from the CommonMind Consortium showed that HERVs are actively expressed in  
33 the brain (n = 3,979), regulated in *cis* by common genetic variants (n = 1,759), and differentially  
34 expressed in patients (n = 81). Convergent analyses implicate LTR25\_6q21 and ERVLE\_8q24.3h  
35 as HERVs of etiological relevance to schizophrenia, which are co-regulated with genes involved in  
36 neuronal and mitochondrial function, respectively. Our findings provide a strong rationale for  
37 exploring the retrogenome and the expression of these locus-specific HERVs as novel risk factors  
38 for schizophrenia and potential diagnostic biomarkers and treatment targets.

39

## 40 **Introduction**

41 Human endogenous retroviruses (HERVs) are remnants of genetic material acquired through our  
42 evolutionary past which originated from the infection of germline cells with ancient retroviruses.  
43 These viruses multiplied through a copy-and-paste mechanism and were eventually endogenized  
44 (i.e., vertically transmitted), and now constitute approximately 8% of the genome<sup>1,2</sup>. These repetitive  
45 sequences were generally assumed to be transcriptionally inactive in the modern genome, having a  
46 purely regulatory function due to the retainment of the viral promoters (long-terminal repeats, LTRs).  
47 However, certain HERVs were co-opted to serve novel specialized roles, including in the regulation  
48 of embryonic development<sup>3,4</sup> and neural progenitor cells<sup>5,6</sup>. They have also been implicated in  
49 neuropsychiatric conditions such as amyotrophic lateral sclerosis<sup>7-9</sup>, major depressive disorder,  
50 bipolar disorder, and schizophrenia<sup>10-12</sup>. Despite their abundance in the genome and relevance to  
51 disease and fundamental aspects of human biology, the location and function of most HERVs remain  
52 elusive to-date.

53

54 Recent large genome-wide association studies (GWAS) comparing schizophrenia cases and non-  
55 affected individuals enabled the identification of polymorphisms mediating risk for this disorder<sup>13-15</sup>.  
56 These studies highlight the substantial contribution of risk attributed to the non-coding genome,  
57 where HERVs are encoded, which are often overlooked in both genomic and transcriptomic  
58 studies<sup>16</sup>. Until recently, there was no comprehensively annotated map of HERVs in the genome,  
59 and there were no computationally efficient tools to analyze the expression of these repetitive  
60 sequences with single-locus resolution. Consequently, previous studies were unable to test whether  
61 locus-specific HERVs were genetically associated with traits of interest, or to assess their expression  
62 in conditions of interest, or to distinguish expressed from dormant HERVs from within the same  
63 family, which contributed to the generation of inconclusive findings. For example, Karlsson and  
64 colleagues<sup>17</sup> reported decreased ERV9 expression in the brain of schizophrenia patients, whereas  
65 Diem and collaborators<sup>18</sup> found the opposite. While the heterogeneity of schizophrenia is also likely  
66 to be a contributing factor for these contradictory findings, there are approximately 120 copies of  
67 ERV9 in the genome<sup>19,20</sup> that likely also confounded these reports.

68

69 Recently, there have been significant advances in the annotation of HERVs in the genome<sup>20-24</sup>, and  
70 in the development of tools that are able to map repetitive sequences in RNA-sequencing data to  
71 their most likely source of origin in the genome<sup>20,25,26</sup>. These improvements allow for the identification  
72 and quantification of specific HERV copies associated with traits of interest. These advances,  
73 combined with modern population genetic methods, enabled us to identify the contribution of the  
74 ‘retrogenome’ (the full genomic complement of HERVs) and expression of locus-specific HERVs to  
75 schizophrenia etiology and neurobiology.

## 76 **Results**

### 77 **The contribution of polymorphisms in the retrogenome to schizophrenia risk**

78 A recently developed annotation of putatively functional HERV elements describes 14,968 elements  
79 dispersed throughout the genome, which were defined based on the presence of LTRs and remnants  
80 of genetic elements which code for viral proteins like *env*, *gag* or *pol*<sup>20</sup>. We assessed the contribution  
81 of common genetic variants within HERVs to schizophrenia susceptibility using GARFIELD<sup>27</sup>. This  
82 pipeline quantifies the co-localization of GWAS results with variants in annotation categories (i.e.  
83 variants in the retrogenome), assessing significance using linear models that control for minor allele  
84 frequency and linkage disequilibrium. For comparison, enrichment was also calculated for heritable  
85 neuropsychiatric traits and non-neuropsychiatric phenotypes: height, body mass index, coronary  
86 artery disease, Crohn's Disease, type 2 diabetes, neuroticism, eczema, major depressive disorder,  
87 bipolar disorder, Alzheimer's disease, attention deficit hyperactivity disorder, amyotrophic lateral  
88 sclerosis, and autism spectrum disorder (**Figure 1**; full results on **Supplemental Table 1**).

89 Polymorphisms within HERVs were significantly enriched for genome-wide significant variants ( $P <$   
90  $5.00 \times 10^{-8}$ ) associated with schizophrenia ( $P_{\text{enrichment}} = 1.88 \times 10^{-5}$ ,  $P_{\text{corrected}}$  [for 14 traits and 2 GWAS  
91 thresholds tested] =  $5.27 \times 10^{-4}$ ,  $\beta = 0.90$ , 95% CI [0.49, 1.31]). Analysis of variants associated with  
92 these traits under a more relaxed  $P$  cut-off ( $P < 5.00 \times 10^{-5}$ ) also showed an enrichment for  
93 schizophrenia only ( $P_{\text{enrichment}} = 4.56 \times 10^{-7}$ ,  $P_{\text{corrected}} = 1.28 \times 10^{-5}$ ,  $\beta = 0.57$ , 95% CI [0.35, 0.80]).  
94 These findings suggest a role for the retrogenome in the etiology of this neurodevelopmental  
95 disorder.

96

97

<<< **Figure 1** >>>

98

### 99 **The contribution of locus-specific HERVs and HERV families to schizophrenia susceptibility**

100 We co-localized polymorphisms within individual HERVs and those associated with schizophrenia  
101 by GWAS using MAGMA<sup>28</sup>, which calculates gene-level statistics and weighted p-values based on  
102 summary statistics whilst adjusting for gene size, single nucleotide polymorphism (SNP) density and  
103 linkage disequilibrium. This gene-level enrichment analysis revealed that 148 HERVs from multiple  
104 families were significantly enriched for risk variants implicated in schizophrenia, after correcting for

105 the number of HERVs tested ( $P_{\text{corrected}} < 0.05 / 12,389$  HERVs in chromosomes 1-22, excluding those  
106 at the major histocompatibility locus; **Supplemental Table 2**). The quantile-quantile plot highlights  
107 the contribution of many locus-specific HERVs associated with risk, compared to an expected normal  
108 distribution (**Figure 2A**), and the Manhattan plot shows their diverse genomic location (**Figure 2B**).

109

110 To explore the contribution of HERV families towards schizophrenia risk, we investigated whether  
111 any of the 60 families defined in the HERV annotation were overrepresented in the list of  
112 schizophrenia-associated HERVs using a gene-set enrichment analysis in MAGMA. Each HERV  
113 was assigned to a family based on the RepBase model that most closely matched the internal region  
114 sequences<sup>20,29</sup>. We observed a nominal association between schizophrenia and the HERVL40 family  
115 ( $P = 0.02$ ,  $\beta = 0.14 \pm 0.02$ ,  $SE = 0.07$ ), but this did not survive multiple testing correction ( $P_{\text{corrected}}$   
116 [for 60 families]  $> 0.05$ ; **Supplemental Figure 1**). These findings suggest that risk for schizophrenia  
117 attributed to the retrogenome may occur via locus-specific sequences, as opposed to entire HERV  
118 families.

119

120 <<< **Figure 2** >>>

121

## 122 **HERV expression in the dorsolateral prefrontal cortex**

123 To advance our understanding of HERV expression in the adult brain, we assessed global HERV  
124 expression (the retrotranscriptome) in the dorsolateral prefrontal cortex (DLPFC) of 593 post-mortem  
125 individuals ( $N = 593$ ), including 279 unaffected controls, 259 schizophrenia patients, 47 bipolar  
126 disorder patients and 8 cases broadly diagnosed with an affective disorder. This was achieved by  
127 applying the Telescope pipeline<sup>20</sup> to the RNA-seq data from the CommonMind Consortium (CMC)  
128 dataset. Analysis of these samples revealed that 3,979 HERVs were consistently expressed in the  
129 DLPFC according to DESeq2 independent filtering criteria (mean normalized counts = 40.79 [37.8,  
130 43.78]; **Figure 3A**). We performed RT-qPCR to confirm the expression of five arbitrarily selected  
131 HERVs in an independent post-mortem cohort of control individuals from the London  
132 Neurodegenerative Diseases Brain Bank ( $N = 10$ ; **Supplemental Material; Supplemental Figure**  
133 **2**).

134

135

<<< **Figure 3** >>>

136

137

### 138 **Cis-acting HERV eQTLs in the DLPFC**

139 To understand how HERVs are regulated in the brain, we performed an expression quantitative trait  
140 loci (eQTL) analysis using all samples (N = 593). Such analysis aims to identify SNPs that explain  
141 variation in the expression of HERVs residing in close proximity, to inform about the basic processes  
142 responsible for HERV regulation, and to complement our genetic enrichment analyses. The genomic  
143 coordinates from the expressed HERVs were remapped to hg19 positions to match genotype  
144 information, and only HERVs from chromosomes 1-22 were analyzed (total = 5,349 HERVs, which  
145 includes lowly expressed HERVs, according to DESeq2's internal filtering criteria). This analysis  
146 revealed that 1,759 HERVs were regulated in *cis* by 1,622 SNPs located within a 1 Mb window  
147 upstream or downstream the start site of the HERV annotation, under the false discovery rate of 5%  
148 ( $q < 0.05$ ). The majority of eQTLs were located within a 10 kb window upstream or downstream of  
149 the annotation start site from the HERV they regulate (**Figure 3B**). Of the 148 HERVs that were  
150 enriched for schizophrenia variants, we observed that 19 were significantly regulated by eQTLs in  
151 the DLPFC (**Supplemental Tables 2 and 3**, highlighted in green; **Figure 3C**).

152

### 153 **Case-control differences in HERV expression**

154 We observed 81 HERVs as differentially expressed between cases (N = 259) and unaffected  
155 individuals (N = 279) under the false discovery rate of 5%, independent of a genetic association with  
156 schizophrenia ( $q < 0.05$  [corrected for the 3,979 expressed HERVs]; **Supplemental Figure 4**,  
157 **Supplemental Table 4**). Our analysis showed that 36 HERVs were downregulated and 45  
158 upregulated in cases, and that expression differences were subtle, with log2 fold-changes of  $0.18 \pm$   
159  $0.10$  on average.

160

161 **Convergent analyses implicate ERVLE\_8q24.3h and LTR25\_6q21 as robust risk factors for**  
162 **schizophrenia**

163 To make a more informative assessment of HERV expression differences associated with disease  
164 status, we first explored whether HERVs identified as genetic risk factors for this disorder were  
165 expressed in the DLPFC. Of the 148 HERVs identified via gene-level enrichment analysis, only 65  
166 were consistently expressed across samples according to DESeq2 internal filtering criteria, with  
167 mean normalized counts of 57.5, CI 95% [12.59, 102.3]. Of these, we observed that two were  
168 significantly upregulated (ERV316A3\_12q24.11, log<sub>2</sub> fold-change = 0.16, standard error = 0.06;  
169 LTR25\_6q21, log<sub>2</sub> fold-change = 0.09, standard error = 0.04), and one downregulated  
170 (ERVLE\_8q24.3h; log<sub>2</sub> fold-change = -0.09, standard error = 0.04) in schizophrenia cases relative  
171 to unaffected controls, under the false discovery rate of 5% ( $q < 0.05$  [corrected for 65 HERVs];  
172 **Figures 3C and D; Supplemental Table 5**).

173  
174 Of the three HERVs enriched for schizophrenia variants and differentially expressed in cases, we  
175 observed that two were modulated by eQTLs (**Figures 3C and D**, highlighted in blue), which we  
176 initially hypothesized could explain the case-control differences observed. These included  
177 **ERVLE\_8q24.3h** and **LTR25\_6q21**, which were regulated by the top eQTLs, **rs4875048** and  
178 **rs174399**, respectively. Importantly, **rs4875048** is associated with schizophrenia and is in linkage  
179 disequilibrium with the top association signal at this locus, rs10552126; **rs174399** is in linkage  
180 disequilibrium with a risk variant at the locus, rs11153302 (**Table 1**)<sup>14</sup>. Strikingly, no gene within a 1  
181 Mb window upstream or downstream of either of the two top eQTLs was associated with  
182 schizophrenia according to a recent analysis by PsychENCODE  
183 (<http://resource.psychencode.org/>)<sup>30</sup>.

184  
185 We observed complex regulatory mechanisms governing expression of these two HERVs.  
186 **ERVLE\_8q24.3h** was significantly downregulated in cases, but, contrary to what was expected, the  
187 risk (A-) allele of **rs4875048** was associated with increased expression of this HERV ( $\beta = -0.35$ ,  $P_{\beta}$   
188  $_{\text{dist.}} = 0.002$ ,  $q = 0.007$ , **Figure 4A**). Similarly, **LTR25\_6q21** was upregulated in patients, but the risk  
189 (G-) allele of **rs174399** was associated with reduced expression of this HERV ( $\beta = 0.29$ ,  
190  $P_{\beta \text{ dist.}} = 0.004$ ,  $q = 0.02$ ; **Figure 4B**). We investigated the effect of these eQTLs in cases and control  
191 individuals separately, which revealed that they influenced HERV expression exclusively in



192 unaffected individuals, suggesting there is a compensatory mechanism in patients counteracting the  
193 effects of the eQTLs (**Figures 4A and B; Supplemental Table 6**).

194

195 To understand about the regulation of these HERVs during neurodevelopment, we tested their  
196 expression in an *in vitro* model of cortical development, which consisted of neural stem cells from  
197 the CTX0E16 cell line and cells differentiated for 28 days<sup>31-33</sup> (**Supplemental Material,**  
198 **Supplemental Figure 5**). We observed that both HERVs were differentially regulated during  
199 differentiation, suggesting that risk to schizophrenia pertaining these HERVs starts during  
200 neurodevelopment. Interestingly, we also observed that both HERVs are located in the antisense  
201 strand of *SLC16A10* and *IQANK1* introns, respectively. Moreover, LTR25\_6q21 is exclusively  
202 present in humans, whereas ERVLE\_8q24.3h is shared with primates (**Supplemental Figure 6**),  
203 according to the UCSC Genome Browser<sup>34</sup>.

204

205

<<< **Figure 4** >>>

206

207 **ERVLE\_8q24.3h and LTR25\_6q21 are co-regulated with genes implicated in mitochondrial**  
208 **and synaptic function in the adult brain, respectively**

209

210 To explore the potential function of ERVLE\_8q24.3h and LTR25\_6q21, we determined the genes  
211 that are co-expressed with these HERVs by applying Weighted Correlation Network Analysis  
212 (WGCNA)<sup>35</sup> to the RNA-seq data from schizophrenia patients and controls combined. This systems  
213 biology approach is based on the hypothesis that genes within the same co-regulated network share  
214 the same function<sup>36</sup>. We observed 19 modules of co-expression in these data (**Supplemental**  
215 **Tables 7 and 8, Supplemental Figure 7**). LTR25\_6q21 was assigned to the green module (module  
216 membership statistic (MM) = 0.41,  $P = 3.55 \times 10^{-23}$ ; gene significance (GS) statistic in relation to  
217 case-control status: 0.12, GS  $P = 0.005$ ), whereas ERVLE\_8q24.3h was assigned to the turquoise  
218 module (MM = 0.46,  $P = 4.81 \times 10^{-29}$ ; GS = -0.15, GS  $P = 5.14 \times 10^{-4}$ ). Gene Ontology (GO) analysis  
219 of the green module indicates that this gene set is associated with neuronal function, with significant  
220 terms including “synapse organization”, “presynapse” and “vesicle-mediated transport in synapse”

221 (q < 0.05, **Figure 5A**, upper panel, **Supplemental Table 9**). The turquoise module, in turn, was  
222 significantly associated with mitochondrial function, with terms including the “respiratory chain” and  
223 “mitochondrial matrix”, and “NADH dehydrogenase complex assembly” (q < 0.05, **Figure 5A**, lower  
224 panel, **Supplemental Table 9**).

225

226 A correlation between the first principal component capturing the variability within each module  
227 (module eigengene) and case-control status (‘Profile’) was performed in WGCNA, which revealed  
228 that the green module is positively associated with case-control status (r = 0.13, P = 0.003), whereas  
229 the turquoise module was negatively associated (r = -0.15, P = 4 x 10<sup>-4</sup>; **Figure 5B**). The co-  
230 expression modules were detected assuming a signed network, which means that a positive module-  
231 trait correlation entails higher expression of genes in the module in association with disease status,  
232 and vice-versa, corroborating the case-control differences observed for each HERV in the previous  
233 analysis (**Figures 4A and B**, left panels).

234

235 To understand the function of other HERVs associated with schizophrenia from the gene-level  
236 enrichment analysis performed using MAGMA (**Supplemental Table 2**), we identified the co-  
237 expression modules associated with each enriched HERV that was expressed in the brain  
238 (**Supplemental Table 10**). We observed that several of these HERVs were assigned to modules  
239 implicated in synaptic organization, including MER41\_1p33 and MER41\_5p12 alongside  
240 LTR25\_6q21 in the green module, as well as synaptic function, including HERVL\_14q24.2d,  
241 HERVL40\_8q21.3b, HERVW\_6q21c, HML3\_5p12a and MER41\_2q31.2 in the red module.  
242 Interestingly, we observed that these two modules were clustered together in an unsupervised  
243 hierarchical clustering analysis performed in WGCNA, corroborating a related or shared function  
244 (**Supplemental Figure 8**).

245

246

<<< Figure 5 >>>

247

248 **LTR25\_6q21 belongs to a module associated with increased neuronal counts, whereas**  
249 **ERVLE\_8q24.3h does not robustly correlate with major neural cell types**

250 We investigated the major cell types associated with each modules eigengene (the first principal  
251 component of the module) to infer the cell types associated with ERVLE\_8q24 and LTR25\_6q21.  
252 We estimated the proportion of neural cell types in the RNA-sequencing data by applying the R  
253 package BRETIGEA<sup>37</sup> to the normalized gene counts of the RNA-sequencing data. BRETIGEA  
254 estimates the cell type proportions that constitute the sequenced material based on a database of  
255 single-cell RNA-sequencing data, ultimately generating coefficients that represent the proportion of  
256 astrocytes, microglia, endothelial cells, oligodendrocytes, oligodendrocyte progenitor cells and  
257 neurons in the sequenced samples<sup>37</sup>. To infer the cell types associated with each module, we  
258 performed correlations between each module and the cell-type proportion coefficients (**Figure 5B**).  
259 The module assigned to LTR25\_6q21 (green) was significantly correlated with the expression of  
260 neuronal markers ( $r = 0.24$ ,  $P = 3 \times 10^{-8}$ ), and negatively associated with the expression of all other  
261 cell types ( $q < 0.05$ , corrected for the six cell types tested and the two modules of interest), consistent  
262 with a role for this module in the regulation of neuronal function, as indicated by the GO analysis.  
263 The module assigned to ERVLE\_8q24.3h (turquoise) was negatively correlated with the expression  
264 of oligodendrocyte progenitor cell markers ( $r = -0.21$ ,  $P = 6 \times 10^{-7}$ ,  $q < 0.05$ ), but showed no  
265 correlation with the other cell types, which may suggest a specific role for this HERV in non-dividing  
266 cells. Ultimately, these data indicate that LTR25\_6q21 and ERVLE\_8q24.3h are part of co-regulated  
267 networks implicated in neuronal and mitochondrial function, respectively, suggesting their  
268 involvement in these cell functions.

269  
270  
271

## 272 **Discussion**

273 HERVs are ancient viral genetic elements scattered throughout the genome, with previously  
274 hypothesized influences on neurodevelopment and risk for schizophrenia. We took a comprehensive  
275 approach to reconsider the role of HERVs at the omics level, leveraging on the recent advances in  
276 the genomic annotation of HERVs, single-locus resolution quantification, systems biology methods,  
277 and population genetic tools.

278

279 We investigated the combined contribution of HERVs (the retrogenome) to risk for schizophrenia  
280 and other complex polygenic traits, by assessing the overlap between SNPs implicated in these traits  
281 and those in genomic locations encompassing HERVs. We were surprised to find that schizophrenia  
282 was the only tested trait significantly enriched for common variants within the retrogenome,  
283 especially since there is evidence linking HERVs to conditions like amyotrophic lateral sclerosis<sup>7-9</sup>,  
284 Crohn's disease<sup>38</sup>, major depressive disorder and bipolar disorder<sup>10,11</sup>. The fact that the retrogenome  
285 is significantly enriched for polymorphisms implicated in schizophrenia suggests that HERVs  
286 comprise an important set of risk factors for this disorder, within the 'non-coding' genome.

287

288 We investigated which HERV families and locus-specific HERVs could be particularly important in  
289 moderating risk for schizophrenia at the genetic level by co-localizing risk variants with individual  
290 HERV loci from across 60 families. We identified 148 specific HERVs enriched for schizophrenia-  
291 associated SNPs. A subsequent gene-set analysis did not find a particular HERV family enriched for  
292 schizophrenia variants, further suggesting that disparate HERVs scattered throughout the genome  
293 moderate susceptibility rather than whole families. These findings have several implications for the  
294 interpretation of previous studies in the literature, and may explain how our results differ from  
295 previous data implicating other HERVs or HERV families as risk factors, which may not have been  
296 identified here. Most HERV expression research to-date has been performed using microarrays,  
297 antibodies or RT-qPCR probes, which do not provide sufficient specificity to assess single HERVs<sup>7-  
298 11</sup>. Therefore, previous studies may have captured the expression of multiple HERVs concomitantly  
299 due to their repetitive sequences. Based on our findings, it is unlikely that individual HERVs (even  
300 from within the same family) contribute equally to risk. The HERV annotation developed by Bendall

301 and colleagues<sup>20</sup>, as well as the Telescope pipeline, and the application of modern population  
302 genetic methods, enabled us to revisit the role HERVs play in relation to schizophrenia risk on a  
303 genome-wide scale, and allow for more robust inferences regarding their etiological relevance.

304  
305 Next, to better understand HERV expression regulation in the brain, we analyzed RNA-sequencing  
306 data from the CommonMind Consortium, which confirmed widespread HERV expression in the adult  
307 brain and cis-regulatory mechanisms. We found 3,979 HERVs actively expressed in a key brain area  
308 linked to schizophrenia pathophysiology, the DLPFC<sup>39</sup>. We further identified 1,759 HERVs that were  
309 regulated by 1,622 short-range (cis-) eQTLs in the DLPFC. The identification of eQTLs that impact  
310 HERV expression informs us about the basic processes responsible for HERV regulation, and can  
311 be useful for the interpretation of GWAS findings in the context of the retrogenome<sup>40,41</sup>. In addition,  
312 these results suggest that SNPs within HERVs are not simply affecting the expression of neighboring  
313 protein-coding genes via their LTRs, rather it demonstrates that common genetic variation impacts  
314 locally on HERV expression.

315  
316 We used a complementary set of analyses to identify the most robust HERVs implicated in  
317 schizophrenia. Two HERVs, **ERVLE\_8q24.3h** and **LTR25\_6q21**, identified from the gene-level  
318 enrichment analysis, were found to be regulated by schizophrenia-associated eQTLs, and were  
319 found to be differentially expressed in the DLPFC of patients and in an *in vitro* model of cortical  
320 neurodevelopment. These findings suggest a potential risk mechanism for schizophrenia that starts  
321 during neurodevelopment and persists through to adulthood, as observed for schizophrenia risk  
322 genes such as *NT5C2*, *AS3MT*, and *BORCS7*<sup>33,42</sup>. Importantly, we observed a complex regulation  
323 of both HERVs, whereby the lead eQTLs only exerted their regulatory effects in unaffected  
324 individuals. This suggests that compensatory mechanisms (e.g. epigenetic alterations) may be  
325 acting to correct for the effects of the risk variants on the expression of these HERVs in the DLPFC  
326 of schizophrenia patients.

327  
328 We also describe here, for the first time, the co-regulation of several HERVs with known genes in  
329 the adult brain, and the GO terms associated with each co-expression module. Our findings suggest

330 that LTR25\_6q21 is implicated in neuronal function, whereas ERVLE\_8q24.3h is involved in  
331 mitochondrial function. WGCNA has been successfully used to predict the biological function of  
332 unknown genes or non-coding RNAs in different organisms<sup>43,44</sup>, and to identify clinically relevant cell  
333 types when in combination with cell-type deconvolution analysis<sup>45</sup>, and thus represents a powerful  
334 approach to functionally characterize the HERVs expressed in the brain. For a long time HERVs  
335 were assumed to be mere regulatory DNA sequences, but the discovery of their expression and co-  
336 regulation with several other genes implicated in multiple biological processes in the brain, ranging  
337 from neuronal, glial and mitochondrial regulation to splicing and cell motility (**Supplemental Table**  
338 **9**), is a landmark for HERV research, and adds an extra layer of complexity to our understanding of  
339 human neurobiology.

340

341 There are limitations to this study which should be acknowledged. Schizophrenia is a highly  
342 polygenic, heterogeneous disorder, and as such large sample sizes are required for appropriate  
343 comparisons. The CommonMind Consortium provides the largest and best characterized cohort of  
344 schizophrenia cases and unaffected individuals with RNA-sequencing data to-date, but it might be  
345 underpowered for case-control comparisons considering the heterogeneity of schizophrenia.  
346 Nevertheless, we complemented case-control comparisons with genomic and eQTL analyses to  
347 provide additional insights. Another limitation to our study is that it investigated RNA-sequencing  
348 data from bulk DLPFC tissue only, which is composed of a heterogeneous mixture of several types  
349 of neurons and glial cells, and it is possible that HERVs expressed in particular cell types, or in other  
350 brain regions, are more relevant to risk<sup>46</sup>. To address this, we performed cell type deconvolution  
351 using BRETIGEA to determine cell-type specific effects, but ultimately the analysis of data from other  
352 brain areas, developmental time points and single-cell datasets has the potential to reveal important  
353 insights about the etiology of schizophrenia in relation to HERV expression. In addition, our post-  
354 mortem and *in vitro* work suggest HERV expression is important in the DLPFC and during its  
355 development, but we still do not know the function of these HERVs. To infer function we performed  
356 WGCNA which provides insight into which processes risk HERVs moderate, but future functional  
357 studies are required to definitively characterize how HERVs, particularly ERVLE\_8q24.3h and  
358 LTR25\_6q21, influence the transcriptome, neural stem cell proliferation or neuronal differentiation in

359 the context of schizophrenia risk, as is currently being investigated in relation to protein-coding risk  
360 genes<sup>32,33,47,48</sup>.

361

362 The development of a retrogenome annotation, and advances in modern population genetic methods  
363 and transcriptomic tools, now allows us to investigate HERVs at the omics level, in the context of  
364 risk for many biological traits. Our work studying the role of HERVs in the brain, and their relationship  
365 to schizophrenia ignites a new, provocative line of thought implicating HERVs as biological risk  
366 factors for schizophrenia and confirms that these previously assumed 'dormant' sequences in the  
367 brain may not be dormant after all.

## 368 **Online Methods**

369 We used a combination of gene expression, genetic and *in vitro* analyses to identify the most robust  
370 HERVs implicated in schizophrenia risk (**Figure 6**). Further details are provided in the **Supplemental**  
371 **Material**.

372 <<< **Figure 6** >>>

373

## 374 **Genetic enrichment analyses**

375 We estimated the contribution of genetic polymorphisms within the retrogenome towards risk of  
376 developing multiple traits using GARFIELD<sup>27</sup>. We downloaded summary statistics from well-powered  
377 genome-wide association studies, including of schizophrenia (N = 105,318 individuals)<sup>14</sup>, height (N  
378 = 693,529)<sup>49</sup>, body mass index (N = 681,275)<sup>49</sup>, coronary artery disease (N = 547,261)<sup>50</sup>, Crohn's  
379 Disease (N = 59,957)<sup>51</sup>, type 2 diabetes (N = 659,316)<sup>52</sup>, neuroticism (N = 2,370,390)<sup>53</sup>, eczema (N  
380 = 103,066)<sup>54</sup>, major depressive disorder (N = 480,359)<sup>55</sup>, bipolar disorder (N = 51,710)<sup>56</sup>, Alzheimer's  
381 disease (N = 74,046)<sup>57</sup>, attention deficit hyperactivity disorder (N = 53,293)<sup>58</sup>, amyotrophic lateral  
382 sclerosis (N = 36,052)<sup>59</sup>, and autism spectrum disorder (N = 46,350)<sup>60</sup>, which analyzed European  
383 cohorts only. GARFIELD performs greedy pruning of SNPs in GWAS summary statistics (those in  
384 linkage disequilibrium, with  $R^2 > 0.1$ ), and quantifies enrichments using odds ratios, assessing their  
385 significance by employing generalized linear model testing, controlling for minor allele frequency,  
386 and number of linkage disequilibrium proxies ( $R^2 > 0.8$ ). Linkage disequilibrium and allele frequency  
387 information were calculated based on the UK10K study. Enrichments were calculated based on  
388 summary statistics from each trait using two  $P_{\text{association}}$  thresholds:  $P < 5 \times 10^{-8}$ , to test the enrichment  
389 of HERVs within genome-wide significant variants; and a more relaxed threshold,  $P < 5 \times 10^{-5}$ , to  
390 allow signal capture in less powered GWAS. The enrichment significance was corrected for the  
391 number of tests performed [14 traits and two P-value thresholds tested]. For consistency with the  
392 GWAS data, the HERV annotation used in the expression analysis (hg38) was remapped to hg19  
393 coordinates using liftOver<sup>34</sup>.

394

395 To identify locus-specific HERVs and potential HERV families associated with schizophrenia, we  
396 used MAGMA 1.07b<sup>28</sup>. Briefly, MAGMA calculates gene-level enrichment by generating a gene-wide



397 statistic from summary statistics, adjusting for gene size, variant density, and linkage disequilibrium  
398 using the 1000 Genomes Phase 3 European reference panel. SNPs from the summary statistics  
399 were assigned to HERVs using an annotation window of 10 kb upstream and downstream of each  
400 HERV (as suggested by the authors)<sup>28</sup>. A Bonferroni correction was applied to identify significantly  
401 enriched HERVs ( $P_{\text{cut-off}} < 4.03 \times 10^{-6}$  [  $0.05 / 12,393$  HERVs in chromosomes 1-22, excluding the  
402 major histocompatibility locus]). Q-Q and Manhattan plots were generated using qqman 0.1.4<sup>61</sup>.  
403 Gene-set enrichment analysis was additionally performed using MAGMA, to test whether HERVs  
404 associated with schizophrenia in the previous step were enriched for any of the 60 HERV families  
405 (excluding HERVs located in sex chromosomes or at the MHC locus – chromosome 6: 26 – 34 Mb).

406

#### 407 **The CommonMind Consortium dataset**

408 To identify HERV expression differences in schizophrenia patients, or HERV expression quantitative  
409 trait loci (eQTL) in the dorsolateral prefrontal cortex, we analyzed RNA-sequencing data from the  
410 CommonMind Consortium (release 1.0, N = 593 individuals, <https://doi.org/10.7303/syn2759792>)<sup>39</sup>.  
411 This dataset consisted of dorsolateral prefrontal cortex (DLPFC) samples from 279 unaffected  
412 individuals, 259 schizophrenia cases, 47 bipolar disorder patients and 8 cases broadly diagnosed  
413 with an affective disorder. Access to this dataset, which includes expression, genotype and clinical  
414 data, was granted under a Material Transfer Agreement with the NIMH Repository and Genomics  
415 Resources. Briefly, autopsy samples from the Mount Sinai NIH Brain Bank and Tissue Repository,  
416 the University of Pennsylvania Brain Bank of Psychiatric illnesses and Alzheimer's Disease Core  
417 Center, and The University of Pittsburgh Brain Tissue Donation Program, were sent to the Icahn  
418 School of Medicine at Mount Sinai for nucleic acid isolation and sequencing. Individuals were  
419 diagnosed according to the Diagnostic and Statistical Manual of Mental Disorders, 4th Edition, as  
420 determined in consensus conferences after review of medical records and interviews of family  
421 members and care providers. Total RNA was extracted from autopsy tissue using the RNeasy kit  
422 (QIAGEN, Hilden, Germany). Ribosomal RNA was depleted using the Ribo-Zero Magnetic Gold kit  
423 (Illumina, San Diego, California, United States), libraries were constructed using the TruSeq RNA  
424 Sample Preparation Kit v2 (Illumina), and samples were sequenced on an Illumina HiSeq 2500. For  
425 whole-genome genotyping, DNA was extracted using the DNeasy Blood and Tissue Kit (QIAGEN)

426 according to the manufacturer's protocol, and samples were genotyped using Illumina Infinium  
427 HumanOmniExpressExome 8 1.1b chips. Further details on quality control and sample processing  
428 are described in Fromer and colleagues<sup>39</sup>.

429

### 430 **RNA-sequencing data processing and HERV expression quantification**

431 Bam files containing mapped and unmapped RNA-sequencing reads aligned to the human reference  
432 genome (hg19) using TopHat 2.0.9 and Bowtie 2.1.0, were downloaded to the King's College London  
433 High Performance Computer Cluster Rosalind, using the synapse client (1.7.5). Bam files were  
434 merged, and fastq files were extracted using samtools 1.5<sup>62</sup> and the flag '-F 0x100'. Trimmomatic  
435 0.38<sup>63</sup> was used to prune Illumina adaptors, low quality bases (leading/trailing sequences with phred  
436 score < 3, or those with average score < 15 every four bases), or reads below 36 bases in length.  
437 Trimmed reads were mapped to the human genome hg38 using bowtie2<sup>64</sup> and the parameters --  
438 very-sensitive-local, -k 100, and --score-min L,0,1.6. Subsequently, Telescope 1.0.2 was used to  
439 quantify expression of 14,968 HERVs (annotation version hg38), which we defined as the  
440 retrogenome<sup>20</sup>. We analyzed HERVs with counts > 10 across 4 samples at least, to avoid inflation  
441 driven by lowly expressed elements. Case-control expression differences (N = 538 individuals in  
442 total) were calculated in R<sup>65</sup> using Wald tests in DESeq2<sup>66</sup>, where data was normalized (median of  
443 ratios) and controlled for the main confounders of gene expression estimated by Fromer and  
444 colleagues<sup>39</sup>, which included institution of sample origin, RNA integrity number, gender, post-mortem  
445 interval, age (determined in five bins: #1 = 13-29 years, #2 = 30-49 years, #3 = 50-69 years, #4 =  
446 70-89 years, #5 = 90+ years), as well as the first five population covariates estimated using  
447 multidimensional scaling in PLINK 1.9<sup>67</sup>, and the first ten hidden HERV expression confounders  
448 estimated using sva<sup>68</sup>, considering schizophrenia and unaffected individuals only.

449

### 450 **Whole-genome genotype data processing**

451 Markers with zero alternate alleles, genotyping call rate < 0.98, Hardy-Weinberg  $P < 5 \times 10^{-5}$ , or  
452 individuals with genotyping call rate < 0.90, were removed from the analysis, as described by Fromer  
453 and colleagues<sup>39</sup>. PLINK files were generated containing genotype information for 958,178 variants  
454 for the 593 subjects. Marker alleles were phased to the forward strand, and ambiguously stranded

455 markers were removed. Additional genotype information was imputed from the 1000 Genomes  
456 Phase 1 reference panel using minimac3 and Eagle v2.3 phasing with the Michigan Imputation  
457 Server (<https://imputationserver.sph.umich.edu/index.html>). Genotype information from the 22  
458 autosomes was concatenated using bcftools 1.9 (<https://samtools.github.io/bcftools/bcftools.html>),  
459 non-single nucleotide polymorphisms (SNPs) were excluded, as well as sites with an imputation  $R^2$   
460  $< 0.8$ , minor allele frequency  $< 0.05$ , or Hardy-Weinberg  $P < 5 \times 10^{-5}$ .

461

#### 462 **eQTL analysis**

463 Normalized HERV counts per sample were obtained using DESeq2 (N = 593), and HERV expression  
464 was tested for the effect of genotype at all variants located within a 1 Mb window upstream or  
465 downstream from the annotation start site of each HERV using QTLtools<sup>69</sup>, according to the authors'  
466 manual. We covaried for the effect of case-control status, institution of sample origin, RNA integrity  
467 number, gender, post-mortem interval, age (five bins, as described previously), the first five  
468 population covariates, and ten hidden expression confounders estimated using sva<sup>68</sup>  
469 (**Supplemental Figure 3**). eQTL P-values were corrected through estimation of a beta distribution  
470 using a minimum of 1,000 permutations and maximum of 10,000, and were further corrected for the  
471 number of HERVs tested using the false discovery rate method ( $q < 0.05$ ).

472

#### 473 **Weighted Correlation Network Analysis (WGCNA)**

474 WGCNA is a systems biology approach that enables the identification of co-expressed genes in  
475 transcriptomic data, which we used here to identify the genes co-expressed with schizophrenia  
476 HERVs in order to infer their biological function<sup>35</sup>. We used this tool to construct a signed network  
477 consisting of HERVs and genes, which was created based on an adjacency matrix that informs about  
478 the co-expression similarity observed between all pairs of genes and HERVs in the expression data  
479 (i.e. genes and genes, genes and HERVs, HERVs and HERVs). Normalized HERV and gene counts  
480 were variance-stabilized in DESeq2, and were further adjusted for all confounders previously  
481 described, using the *removebatcheffect* function in limma<sup>70</sup>. To achieve this, we combined gene and  
482 HERV counts obtained from the brain of 538 individuals (279 unaffected individuals and 259  
483 schizophrenia cases), and filtered out genes and HERVs that were lowly expressed, i.e. those with

484 < 10 counts in < 80% of samples), as these can drive spurious correlations<sup>35</sup>. The normalized counts  
485 were variance stabilized transformed using DESeq2 and adjusted for institution of sample origin,  
486 gender, case-control status, age bins, post-mortem interval, the first five population dimensions  
487 (estimated in plink), and RIN, using limma<sup>70</sup>. WGCNA identifies modules by applying hierarchical  
488 clustering to the adjacency matrix, further filtering spurious relationships through the application of a  
489 topological overlap approach. We used an  $R^2$  cut-off of 0.8, which corresponds to a  $\beta = 12$ , to  
490 construct the network. Each module was assigned a color, and genes or HERVs not belonging to  
491 any module were assigned to the gray module. The relationship between modules and specific cell  
492 types was tested based on the correlation between the module eigengenes (ME), defined as the first  
493 principal component of the module, and cell count estimates, as described below. We applied the  
494 false discovery rate method to correct for the module-cell type associations ( $q < 0.05$ ). Plots were  
495 generated by WGCNA.

496

#### 497 **Cell type estimates and module correlations**

498 We performed a BRain cEll Type specific Gene Expression Analysis (BRETIGEA)<sup>37</sup> to estimate the  
499 abundance of major neural cell types in the 538 samples analyzed by WGCNA. Briefly, BRETIGEA  
500 uses expression data from single cell RNA-sequencing data sets to identify the proportion of  
501 astrocytes, microglia, endothelial cells, oligodendrocytes, oligodendrocyte progenitor cells and  
502 neurons, in bulk brain gene expression data. More specifically, this tool uses a panel of 50 well-  
503 established cell type-specific markers to generate coefficients that represent the proportion of each  
504 cell type per sample, which were tested for association with each module.

505

#### 506 **Gene Ontology (GO) analyses**

507 We performed GO analyses using the WEB-based GENE SeT AnaLysis Toolkit (Webgestalt)<sup>71</sup> to  
508 identify the function of the genes co-regulated with the schizophrenia HERVs in the brain, and thus  
509 infer the potential function of these HERVs. All genes inputted to WGCNA were used as background  
510 (reference) gene set. We used the false discovery rate method to correct for the GO enrichment  
511 analyses within Webgestalt ( $q < 0.05$ ) and report up to 10 significant GO terms per module. Volcano  
512 plots were generated in Webgestalt.

513

514

515 **Statistical analysis and data visualization**

516 The co-localization of GWAS-supported variants with the retrogenome was calculated using linear  
517 regressions in GARFIELD<sup>27</sup>, and the gene-level and gene-set enrichment analyses were calculated  
518 in MAGMA<sup>28</sup>. Findings were corrected for multiple testing using the Bonferroni method. The case-  
519 control HERV expression differences (N = 538 individuals) and effects of eQTLs on HERV  
520 expression (N = 593 individuals) were calculated, respectively, using Wald tests in DESeq2, and  
521 stepwise linear regressions in QTLtools, respectively. These were corrected using the false  
522 discovery rate ( $q < 0.05$ ), a more permissive multiple testing correction method, to increase our  
523 detection power. The effect of genotype on specific HERVs within cases and control groups,  
524 separately or combined, was calculated using linear regressions in IBM Statistics SPSS 25 (IBM  
525 Corp., Armonk, NY, United States). Other analyses were performed in R<sup>65</sup>. Graphs were generated  
526 in R or Graph Pad Prism 7 (GraphPad Software, San Diego, CA, United States).

527

## 528 **Acknowledgements**

529 The work was supported in part by US National Institutes of Health grants: CA206488 (DFN),  
530 AI076059 (DFN) and UL1TR001876 (KAC). This work was also supported by a grant from the  
531 Coordenação de Aperfeiçoamento de Pessoal de Nível Superior (CAPES, Brazil, Science without  
532 Borders award no. BEX1279/13-0) and an NIHR Maudsley Biomedical Research Centre Career  
533 Development Award to RRRD. TRP is funded by a Medical Research Council (MRC) Skills  
534 Development Fellowship (MR/N014863/1). This study represents independent research part funded  
535 by the NIHR-Wellcome Trust King's Clinical Research Facility and the National Institute for Health  
536 Research (NIHR) Biomedical Research Centre at South London and Maudsley NHS Foundation  
537 Trust and King's College London. The views expressed are those of the authors and not necessarily  
538 those of the NHS, the NIHR or the Department of Health and Social Care. Data for this publication  
539 were obtained from NIMH Repository & Genomics Resource, a centralized national biorepository for  
540 genetic studies of psychiatric disorders. Data were generated as part of the CommonMind  
541 Consortium supported by funding from Takeda Pharmaceuticals Company Limited, F. Hoffman-La  
542 Roche Ltd and NIH grants R01MH085542, R01MH093725, P50MH066392, P50MH080405,  
543 R01MH097276, RO1-MH-075916, P50M096891, P50MH084053S1, R37MH057881, AG02219,  
544 AG05138, MH06692, R01MH110921, R01MH109677, R01MH109897, U01MH103392, and  
545 contract HHSN271201300031C through IRP NIMH. Brain tissue for the study was obtained from the  
546 Mount Sinai NIH Brain and Tissue Repository, the University of Pennsylvania Alzheimer's Disease  
547 Core Center, the University of Pittsburgh NeuroBioBank and Brain and Tissue Repositories, and the  
548 NIMH Human Brain Collection Core. CMC Leadership: Panos Roussos, Joseph Buxbaum, Andrew  
549 Chess, Schahram Akbarian, Vahram Haroutunian (Icahn School of Medicine at Mount Sinai), Bernie  
550 Devlin, David Lewis (University of Pittsburgh), Raquel Gur, Chang-Gyu Hahn (University of  
551 Pennsylvania), Enrico Domenici (University of Trento), Mette A. Peters, Solveig Sieberts (Sage  
552 Bionetworks), Thomas Lehner, Stefano Marengo, Barbara K. Lipska (NIMH). Tissue samples used  
553 in RT-qPCR experiments were supplied by The London Neurodegenerative Diseases Brain Bank,  
554 which receives funding from the Medical Research Council and as part of the Brains for Dementia  
555 Research programme, jointly funded by Alzheimer's Research UK and Alzheimer's Society. We  
556 thank Professor Cathryn Lewis for her comments on the manuscript and Daniel Bean (King's College

557 London) for his assistance with coding. We also thank Richard “Brad” Jones, Mario Ostrowski, and  
558 Nathaniel Bachtel for their comments on this manuscript.

559

560 **Author contributions**

561 Study design: TRP, RRRD. Performed analyses and experiments: RRRD, TRP. Contributed  
562 reagents, biological material, revised the manuscript: MLB, MM, CEO, GAB, SS, CT, GRT, KAC,  
563 DPS, DFN. Wrote the paper: RRRD, TRP.

564

565 **Conflict of Interest**

566 The authors declare no conflict of interest.

567

568 **Data availability**

569 Telescope and the HERV annotation are available at <http://github.com/mlbendall/telescope>. Access  
570 to the CommonMind Consortium dataset can be requested to the NIMH Repository & Genomics  
571 Resource via <https://www.nimhgenetics.org/resources/commonmind>.

572

## 573 References

- 574 1. Gifford, R. & Tristem, M. The evolution, distribution and diversity of endogenous  
575 retroviruses. *Virus Genes* **26**, 291-315 (2003).
- 576 2. Lander, E.S. *et al.* Initial sequencing and analysis of the human genome. *Nature* **409**, 860-  
577 921 (2001).
- 578 3. Mi, S. *et al.* Syncytin is a captive retroviral envelope protein involved in human placental  
579 morphogenesis. *Nature* **403**, 785-9 (2000).
- 580 4. Grow, E.J. *et al.* Intrinsic retroviral reactivation in human preimplantation embryos and  
581 pluripotent cells. *Nature* **522**, 221-225 (2015).
- 582 5. Brattas, P.L. *et al.* TRIM28 Controls a Gene Regulatory Network Based on Endogenous  
583 Retroviruses in Human Neural Progenitor Cells. *Cell Rep* **18**, 1-11 (2017).
- 584 6. Fasching, L. *et al.* TRIM28 Represses Transcription of Endogenous Retroviruses in Neural  
585 Progenitor Cells. *Cell reports* **10**, 20-28 (2015).
- 586 7. Li, W. *et al.* Human endogenous retrovirus-K contributes to motor neuron disease. *Sci*  
587 *Transl Med* **7**, 307ra153 (2015).
- 588 8. Douville, R., Liu, J., Rothstein, J. & Nath, A. Identification of active loci of a human  
589 endogenous retrovirus in neurons of patients with amyotrophic lateral sclerosis. *Annals of*  
590 *neurology* **69**, 141-151 (2011).
- 591 9. Garson, J.A. *et al.* Quantitative analysis of human endogenous retrovirus-K transcripts in  
592 postmortem premotor cortex fails to confirm elevated expression of HERV-K RNA in  
593 amyotrophic lateral sclerosis. *Acta Neuropathol Commun* **7**, 45 (2019).
- 594 10. Perron, H. *et al.* Molecular characteristics of Human Endogenous Retrovirus type-W in  
595 schizophrenia and bipolar disorder. *Transl Psychiatry* **2**, e201 (2012).
- 596 11. Weis, S. *et al.* Reduced expression of human endogenous retrovirus (HERV)-W GAG  
597 protein in the cingulate gyrus and hippocampus in schizophrenia, bipolar disorder, and  
598 depression. *J Neural Transm (Vienna)* **114**, 645-55 (2007).
- 599 12. Yolken, R.H., Karlsson, H., Yee, F., Johnston-Wilson, N.L. & Torrey, E.F. Endogenous  
600 retroviruses and schizophrenia. *Brain Res Brain Res Rev* **31**, 193-9 (2000).
- 601 13. Roussos, P. *et al.* A role for noncoding variation in schizophrenia. *Cell reports* **9**, 1417-1429  
602 (2014).
- 603 14. Pardiñas, A.F. *et al.* Common schizophrenia alleles are enriched in mutation-intolerant  
604 genes and in regions under strong background selection. *Nature Genetics* **50**, 381-389  
605 (2018).
- 606 15. Schizophrenia Working Group of the Psychiatric Genomics Consortium *et al.* Biological  
607 insights from 108 schizophrenia-associated genetic loci. *Nature* **511**, 421 (2014).
- 608 16. Goke, J. & Ng, H.H. CTRL+INSERT: retrotransposons and their contribution to regulation  
609 and innovation of the transcriptome. *EMBO Rep* **17**, 1131-44 (2016).
- 610 17. Karlsson, H. *et al.* Retroviral RNA identified in the cerebrospinal fluids and brains of  
611 individuals with schizophrenia. *Proc Natl Acad Sci U S A* **98**, 4634-9 (2001).
- 612 18. Diem, O., Schäffner, M., Seifarth, W. & Leib-Mösch, C. Influence of Antipsychotic Drugs  
613 on Human Endogenous Retrovirus (HERV) Transcription in Brain Cells. *PLoS ONE* **7**,  
614 e30054 (2012).
- 615 19. Svensson, A.C. *et al.* Chromosomal distribution, localization and expression of the human  
616 endogenous retrovirus ERV9. *Cytogenet Cell Genet* **92**, 89-96 (2001).
- 617 20. Bendall, M.L. *et al.* Telescope: Characterization of the retrotranscriptome by accurate  
618 estimation of transposable element expression. *PLoS Computational Biology* **In press**,  
619 398172 (2018).
- 620 21. Subramanian, R.P., Wildschutte, J.H., Russo, C. & Coffin, J.M. Identification,  
621 characterization, and comparative genomic distribution of the HERV-K (HML-2) group of  
622 human endogenous retroviruses. *Retrovirology* **8**, 90-90 (2011).



- 623 22. Grandi, N., Cadeddu, M., Blomberg, J. & Tramontano, E. Contribution of type W human  
624 endogenous retroviruses to the human genome: characterization of HERV-W proviral  
625 insertions and processed pseudogenes. *Retrovirology* **13**, 67-67 (2016).
- 626 23. Grandi, N. *et al.* Identification of a novel HERV-K(HML10): comprehensive  
627 characterization and comparative analysis in non-human primates provide insights about  
628 HML10 proviruses structure and diffusion. *Mobile DNA* **8**, 15 (2017).
- 629 24. Vargiu, L. *et al.* Classification and characterization of human endogenous retroviruses;  
630 mosaic forms are common. *Retrovirology* **13**, 7 (2016).
- 631 25. Tokuyama, M. *et al.* ERVmap analysis reveals genome-wide transcription of human  
632 endogenous retroviruses. *Proceedings of the National Academy of Sciences* **115**, 12565-  
633 12572 (2018).
- 634 26. Jeong, H.-H., Yalamanchili, H.K., Guo, C., Shulman, J.M. & Liu, Z. An ultra-fast and  
635 scalable quantification pipeline for transposable elements from next generation sequencing  
636 data. in *Biocomputing 2018* 168-179.
- 637 27. Iotchkova, V. *et al.* GARFIELD classifies disease-relevant genomic features through  
638 integration of functional annotations with association signals. *Nature Genetics* **51**, 343-353  
639 (2019).
- 640 28. de Leeuw, C.A., Mooij, J.M., Heskes, T. & Posthuma, D. MAGMA: Generalized Gene-Set  
641 Analysis of GWAS Data. *PLOS Computational Biology* **11**, e1004219 (2015).
- 642 29. Bao, W., Kojima, K.K. & Kohany, O. Repbase Update, a database of repetitive elements in  
643 eukaryotic genomes. *Mobile DNA* **6**, 11 (2015).
- 644 30. Wang, D. *et al.* Comprehensive functional genomic resource and integrative model for the  
645 human brain. *Science* **362**(2018).
- 646 31. Anderson, G.W. *et al.* Characterisation of neurons derived from a cortical human neural  
647 stem cell line CTX0E16. *Stem Cell Res Ther* **6**, 149 (2015).
- 648 32. Deans, P.J.M. *et al.* Psychosis Risk Candidate ZNF804A Localizes to Synapses and  
649 Regulates Neurite Formation and Dendritic Spine Structure. *Biol Psychiatry* **82**, 49-61  
650 (2017).
- 651 33. Duarte, R.R.R. *et al.* The Psychiatric Risk Gene NT5C2 Regulates Adenosine  
652 Monophosphate-Activated Protein Kinase Signaling and Protein Translation in Human  
653 Neural Progenitor Cells. *Biol Psychiatry* **86**, 120-130 (2019).
- 654 34. Hinrichs, A.S. *et al.* The UCSC Genome Browser Database: update 2006. *Nucleic Acids Res*  
655 **34**, D590-8 (2006).
- 656 35. Langfelder, P. & Horvath, S. WGCNA: an R package for weighted correlation network  
657 analysis. *BMC Bioinformatics* **9**, 559 (2008).
- 658 36. van Dam, S., Vosa, U., van der Graaf, A., Franke, L. & de Magalhaes, J.P. Gene co-  
659 expression analysis for functional classification and gene-disease predictions. *Brief*  
660 *Bioinform* **19**, 575-592 (2018).
- 661 37. McKenzie, A.T. *et al.* Brain Cell Type Specific Gene Expression and Co-expression  
662 Network Architectures. *Scientific Reports* **8**, 8868 (2018).
- 663 38. Klag, T. *et al.* Human Endogenous Retroviruses: Residues of Ancient Times Are  
664 Differentially Expressed in Crohn's Disease. *Inflammatory Intestinal Diseases* **3**, 125-137  
665 (2018).
- 666 39. Fromer, M. *et al.* Gene expression elucidates functional impact of polygenic risk for  
667 schizophrenia. *Nature neuroscience* **19**, 1442-1453 (2016).
- 668 40. O'Brien, H.E. *et al.* Expression quantitative trait loci in the developing human brain and  
669 their enrichment in neuropsychiatric disorders. *Genome biology* **19**, 194-194 (2018).
- 670 41. Bray, N.J. & O'Donovan, M.C. The genetics of neuropsychiatric disorders. *Brain and*  
671 *Neuroscience Advances* **2**, 2398212818799271 (2018).
- 672 42. Duarte, R.R.R. *et al.* Genome-wide significant schizophrenia risk variation on chromosome  
673 10q24 is associated with altered cis-regulation of BORCS7, AS3MT, and NT5C2 in the  
674 human brain. *Am J Med Genet B Neuropsychiatr Genet* **171**, 806-14 (2016).

- 675 43. Liu, W. *et al.* Construction and Analysis of Gene Co-Expression Networks in *Escherichia*  
676 *coli*. *Cells* **7**, 19 (2018).
- 677 44. van Dam, S., Vösa, U., van der Graaf, A., Franke, L. & de Magalhães, J.P. Gene co-  
678 expression analysis for functional classification and gene–disease predictions. *Briefings in*  
679 *Bioinformatics* **19**, 575-592 (2017).
- 680 45. Inkeles, M.S. *et al.* Cell-type deconvolution with immune pathways identifies gene networks  
681 of host defense and immunopathology in leprosy. *JCI Insight* **1**(2016).
- 682 46. Tansey, K.E. & Hill, M.J. Enrichment of schizophrenia heritability in both neuronal and glia  
683 cell regulatory elements. *Translational Psychiatry* **8**, 7-7 (2018).
- 684 47. Hill, M.J. *et al.* Knockdown of the schizophrenia susceptibility gene TCF4 alters gene  
685 expression and proliferation of progenitor cells from the developing human neocortex.  
686 *Journal of psychiatry & neuroscience : JPN* **42**, 181-188 (2017).
- 687 48. Hill, M.J., Jeffries, A.R., Dobson, R.J., Price, J. & Bray, N.J. Knockdown of the psychosis  
688 susceptibility gene ZNF804A alters expression of genes involved in cell adhesion. *Hum Mol*  
689 *Genet* **21**, 1018-24 (2012).
- 690 49. Yengo, L. *et al.* Meta-analysis of genome-wide association studies for height and body mass  
691 index in approximately 700000 individuals of European ancestry. *Hum Mol Genet* **27**, 3641-  
692 3649 (2018).
- 693 50. Harst, P.v.d. & Verweij, N. Identification of 64 Novel Genetic Loci Provides an Expanded  
694 View on the Genetic Architecture of Coronary Artery Disease. *Circulation Research* **122**,  
695 433-443 (2018).
- 696 51. de Lange, K.M. *et al.* Genome-wide association study implicates immune activation of  
697 multiple integrin genes in inflammatory bowel disease. *Nat Genet* **49**, 256-261 (2017).
- 698 52. Xue, A. *et al.* Genome-wide association analyses identify 143 risk variants and putative  
699 regulatory mechanisms for type 2 diabetes. *Nature Communications* **9**, 2941 (2018).
- 700 53. Baselmans, B.M.L. *et al.* Multivariate genome-wide analyses of the well-being spectrum.  
701 *Nature Genetics* **51**, 445-451 (2019).
- 702 54. The Early Genetics Lifecourse Epidemiology Eczema Consortium *et al.* Multi-ancestry  
703 genome-wide association study of 21,000 cases and 95,000 controls identifies new risk loci  
704 for atopic dermatitis. *Nature Genetics* **47**, 1449 (2015).
- 705 55. Wray, N.R. *et al.* Genome-wide association analyses identify 44 risk variants and refine the  
706 genetic architecture of major depression. *Nature Genetics* **50**, 668-681 (2018).
- 707 56. Stahl, E.A. *et al.* Genome-wide association study identifies 30 Loci Associated with Bipolar  
708 Disorder. *bioRxiv*, 173062 (2018).
- 709 57. Lambert, J.C. *et al.* Meta-analysis of 74,046 individuals identifies 11 new susceptibility loci  
710 for Alzheimer's disease. *Nat Genet* **45**, 1452-8 (2013).
- 711 58. Demontis, D. *et al.* Discovery of the first genome-wide significant risk loci for attention  
712 deficit/hyperactivity disorder. *Nature Genetics* **51**, 63-75 (2019).
- 713 59. van Rheenen, W. *et al.* Genome-wide association analyses identify new risk variants and the  
714 genetic architecture of amyotrophic lateral sclerosis. *Nat Genet* **48**, 1043-8 (2016).
- 715 60. Grove, J. *et al.* Identification of common genetic risk variants for autism spectrum disorder.  
716 *Nature Genetics* **51**, 431-444 (2019).
- 717 61. Turner, S.D. qqman: an R package for visualizing GWAS results using Q-Q and manhattan  
718 plots. *bioRxiv*, 005165 (2014).
- 719 62. Li, H. *et al.* The Sequence Alignment/Map format and SAMtools. *Bioinformatics* **25**, 2078-  
720 2079 (2009).
- 721 63. Bolger, A.M., Lohse, M. & Usadel, B. Trimmomatic: a flexible trimmer for Illumina  
722 sequence data. *Bioinformatics* **30**, 2114-2120 (2014).
- 723 64. Langmead, B. & Salzberg, S.L. Fast gapped-read alignment with Bowtie 2. *Nature Methods*  
724 **9**, 357 (2012).
- 725 65. R Core Team. R: A language and environment for statistical computing. R Foundation for  
726 Statistical Computing, Vienna, Austria. (2018).

- 727 66. Love, M.I., Huber, W. & Anders, S. Moderated estimation of fold change and dispersion for  
728 RNA-seq data with DESeq2. *Genome Biol* **15**, 550 (2014).
- 729 67. Chang, C.C. *et al.* Second-generation PLINK: rising to the challenge of larger and richer  
730 datasets. *Gigascience* **4**, 7 (2015).
- 731 68. Jeffrey T. Leek *et al.* sva: Surrogate Variable Analysis. *R package Version 3.30.1*,  
732 <https://bioconductor.org/packages/release/bioc/html/sva.html>(2019).
- 733 69. Delaneau, O. *et al.* A complete tool set for molecular QTL discovery and analysis. *Nature*  
734 *Communications* **8**, 15452 (2017).
- 735 70. Ritchie, M.E. *et al.* limma powers differential expression analyses for RNA-sequencing and  
736 microarray studies. *Nucleic Acids Research* **43**, e47-e47 (2015).
- 737 71. Wang, J., Vasaiakar, S., Shi, Z., Greer, M. & Zhang, B. WebGestalt 2017: a more  
738 comprehensive, powerful, flexible and interactive gene set enrichment analysis toolkit.  
739 *Nucleic acids research* **45**, W130-W137 (2017).
- 740

741 **Figures and Table**

### Contribution of polymorphisms in HERVs to selected traits

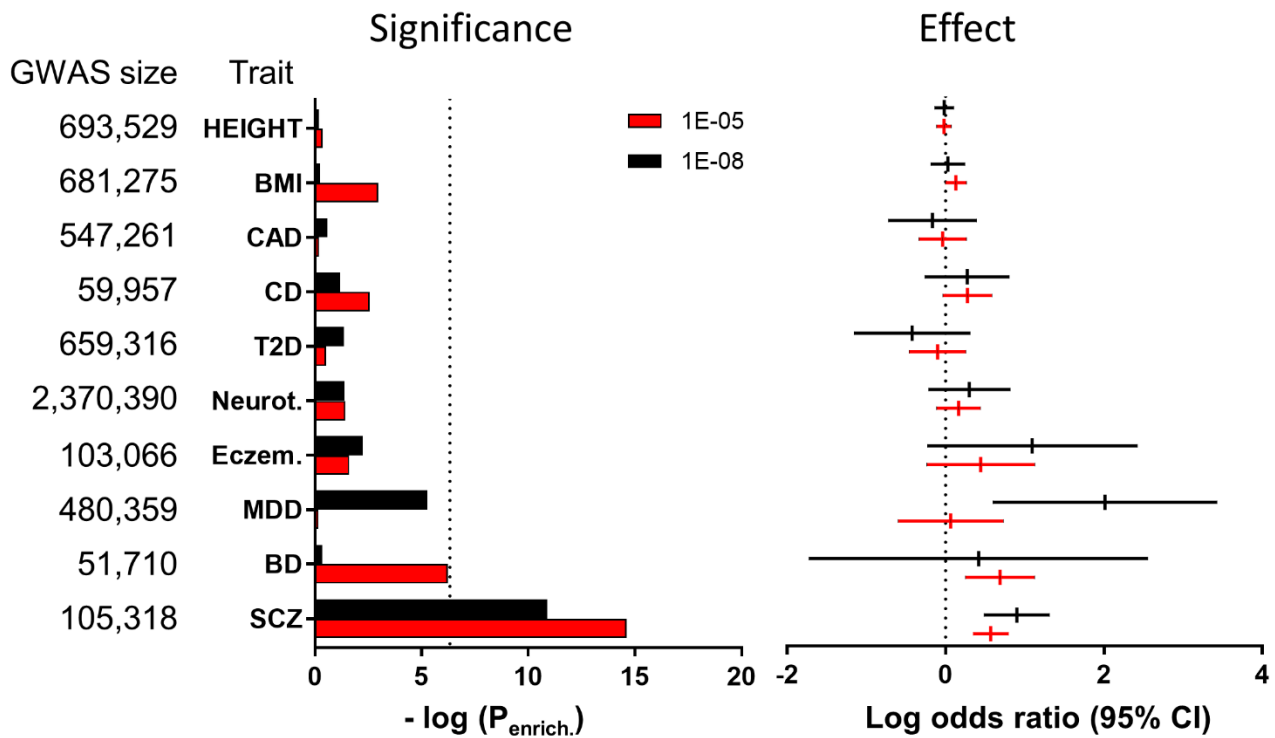

742

743 **Figure 1.** Variants within the retrogenome are enriched with schizophrenia-associated  
744 polymorphisms. No association with any other trait was observed (see **Supplemental Table 1** for  
745 full results). Calculated using GARFIELD<sup>27</sup>.

746

747

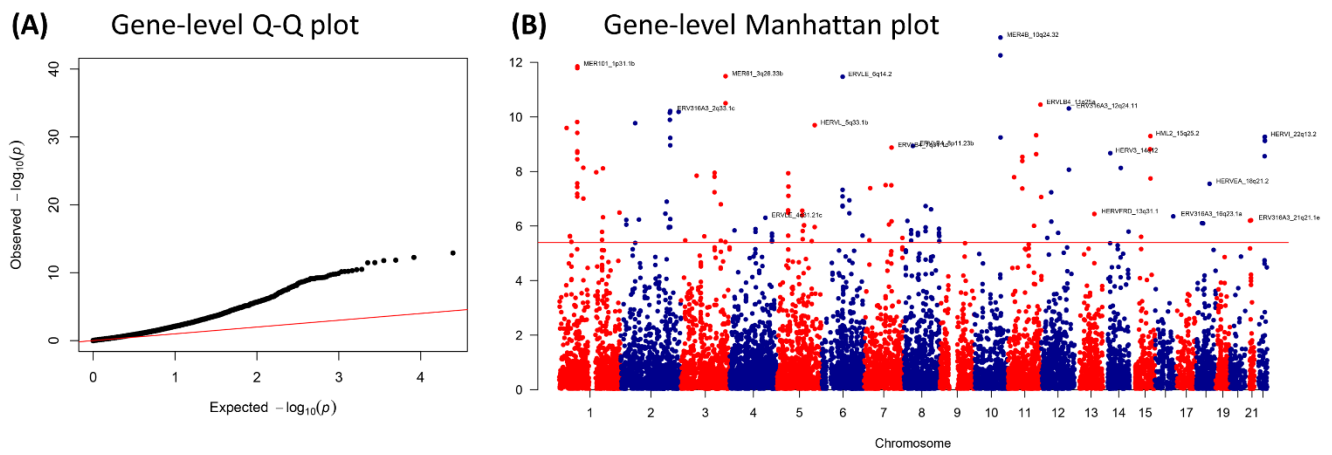

748

749 **Figure 2.** Gene-level enrichment analysis of the schizophrenia GWAS summary statistics using the  
750 HERV annotation developed by Bendall and colleagues<sup>20</sup>, calculated using MAGMA<sup>28</sup>.  
751 Chromosomes 1-22 only, extended MHC region excluded (chromosome 6, from 26-34 Mb). **(A)**  
752 Quantile-quantile plot showing the contribution of several HERVs to schizophrenia genetics  
753 compared to an expected normal distribution (red line). **(B)** Manhattan plot showing the location of  
754 the HERVs associated with schizophrenia. Plots created using qqman<sup>61</sup>. All enriched HERVs are  
755 shown on **Supplemental Table 2**.

756

757

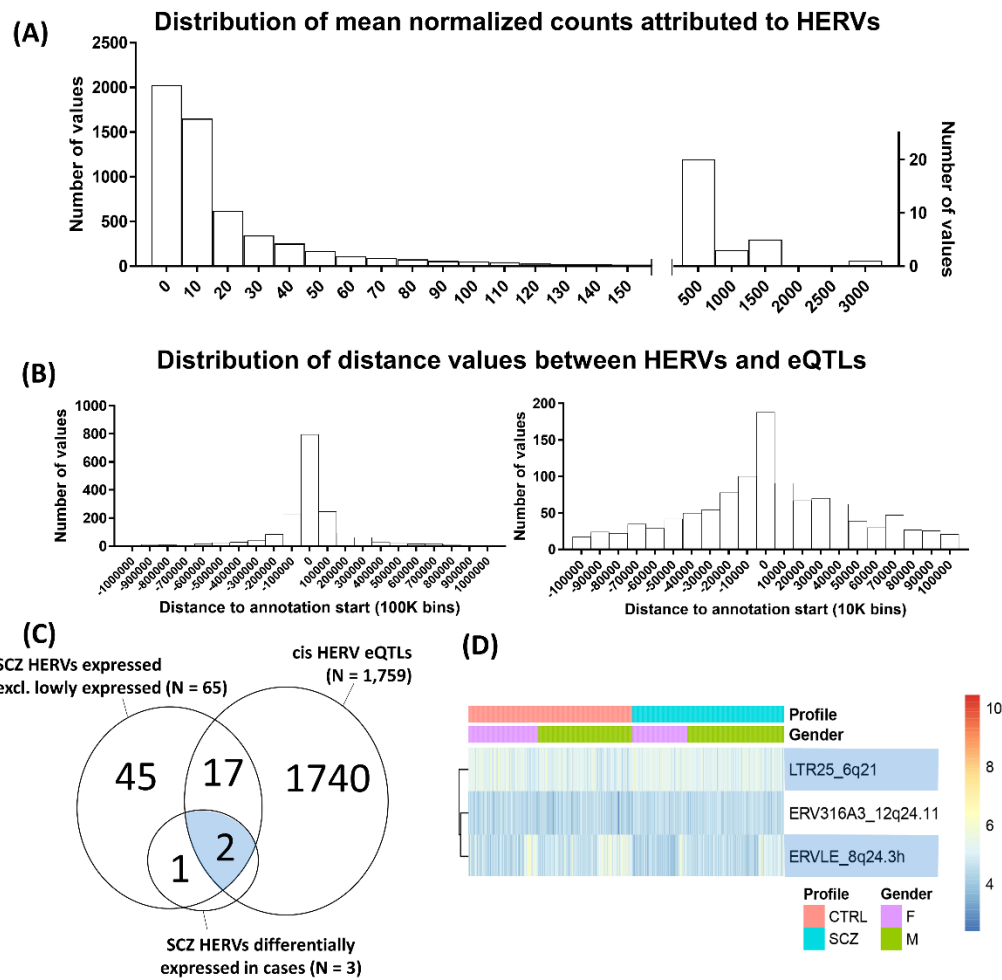

758

759 **Figure 3.** HERV expression in the dorsolateral prefrontal cortex, based on an analysis of the  
 760 CommonMind Consortium dataset with Telescope. **(A)** Frequency distribution of the mean  
 761 normalized counts per HERV across samples showing that the majority of HERVs are lowly  
 762 expressed, according to an analysis of 593 post-mortem brains. Normalized counts do not include  
 763 adjustments utilized in the analyses. **(B)** Distribution of values representing the distance between  
 764 the eQTL for a HERV and the start site for that HERV. Left panel shows all data in bins of 100,000,  
 765 and the right panel only data nearer the start site of the HERVs, in bins of 10,000. A large proportion  
 766 of eQTLs was located within a 10kb window upstream or downstream the start coordinates of the  
 767 HERV they regulate. **(C)** Overlap between the 65 schizophrenia-associated HERVs expressed in  
 768 the brain, the 1,759 HERVs modulated by eQTLs, and the three HERVs enriched for schizophrenia  
 769 variants and additionally differentially expressed between schizophrenia cases (N = 259) and  
 770 unaffected individuals (N = 279). **(D)** Heatmap of the six HERVs enriched for schizophrenia variants  
 771 and further differentially expressed in patients, separated by gender. In blue, HERVs that are  
 772 modulated by eQTLs, as demonstrated in **Figure 4**.

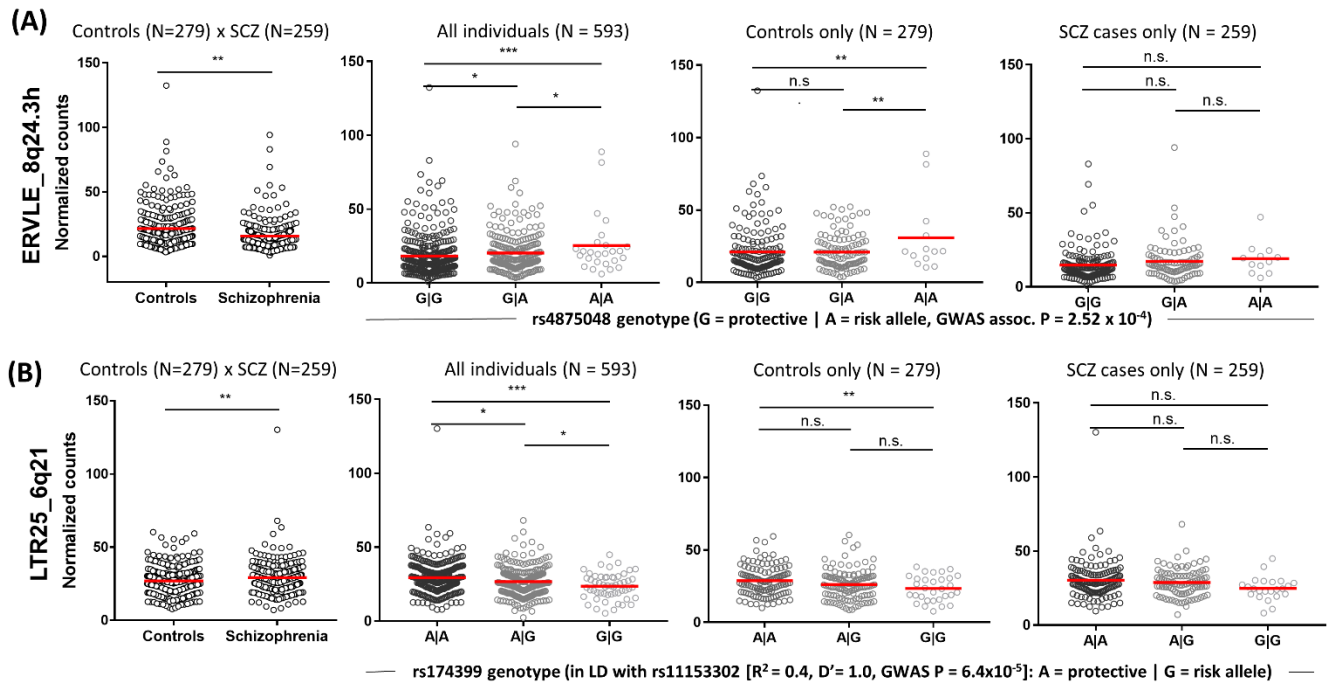

773

774 **Figure 4.** HERVs enriched for schizophrenia variants and differentially expressed between cases  
775 and controls, and according to genotype. eQTLs modulated HERV expression exclusively in control  
776 individuals. Graphs show normalized counts associated with case-control status (left; Wald tests,  
777  $**P < 0.01$ ) or per genotype considering all individuals, control individuals or schizophrenia patients  
778 only (last three graphs, respectively; ANOVAs followed by pairwise comparisons corrected using the  
779 Bonferroni method ( $*P < 0.05$ ,  $**P < 0.01$ ,  $***P < 0.001$ ; n.s.: not significant; **Supplemental Table**  
780 **6**). Data shown are for **(A)** ERVLE\_8q24.3h and its top eQTL in the DLPFC, rs4875048, and **(B)**  
781 LTR25\_6q21 and its top eQTL, rs174399. Values are uncorrected for the factors and covariates  
782 included in the eQTL analysis.

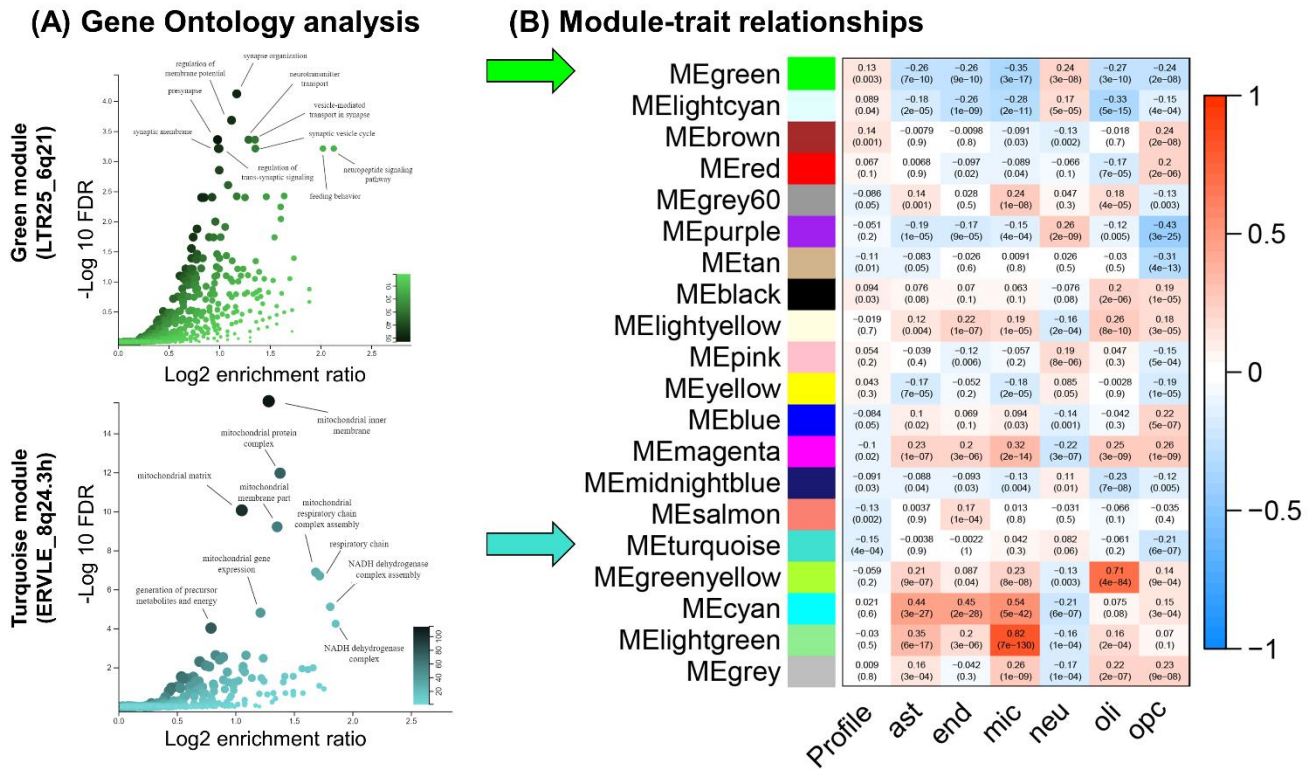

783

784 **Figure 5.** Gene ontology enrichment analysis of the co-expression modules associated with the  
 785 green (LTR25\_6q21) and turquoise modules (ERVLE\_8q24.3h), and correlations between modules  
 786 eigengenes, case-control status (Profile) and coefficients associated with cell counts for major neural  
 787 cell types. **(A)** LTR25\_6q21 belongs to the green module, which is significantly enriched for GO  
 788 terms associated with neuronal function, as shown in the Volcano plot. ERVLE\_8q24.3h, in turn,  
 789 belongs to the turquoise module, which is significantly enriched for GO terms associated with  
 790 mitochondrial function. **(B)** The green module is positively associated with neuronal counts, whereas  
 791 the turquoise module does not correlate strongly with a specific cell type, apart from a negative  
 792 correlation with oligodendrocyte progenitor cell counts. Each cell of the heatmap contains the  
 793 Pearson's r coefficient followed by significance of the correlation (P). Ast: astrocytes, end: endothelial  
 794 cells, mic: microglia, neu: neurons, oli: oligodendrocytes, opc: oligodendrocyte progenitor cells.

795

796



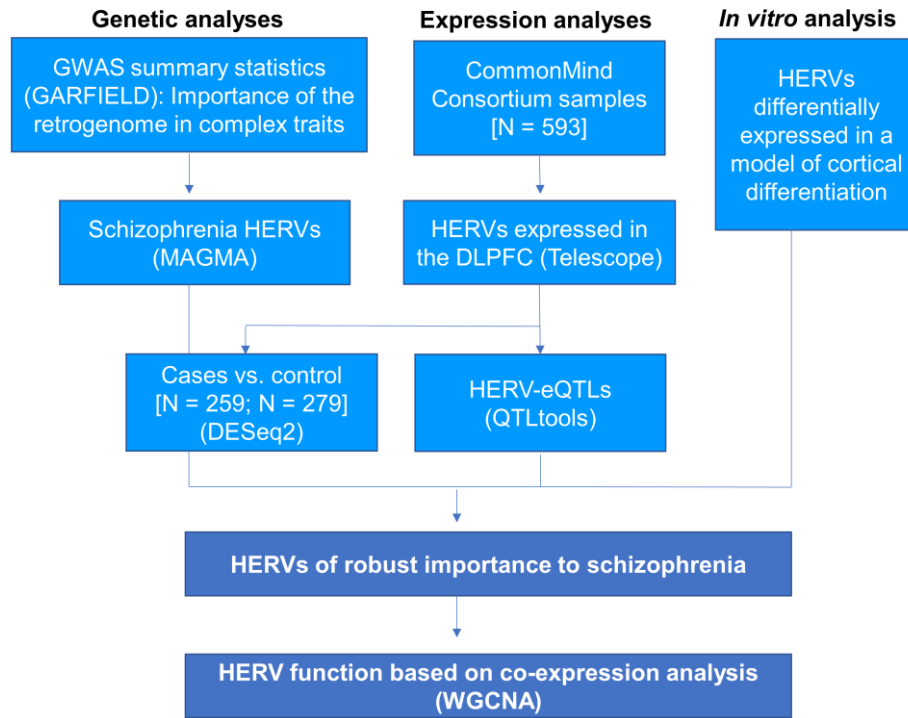

797

798 **Figure 6.** Analysis strategy. We performed a series of analyses using post-mortem brain RNA-  
799 sequencing data, genetic enrichment analyses and *in vitro* cortical differentiation data to identify  
800 HERVs of robust importance in schizophrenia. Bioinformatic tools used are indicated in  
801 parentheses. DLPFC: dorsolateral prefrontal cortex.

**Table 1.** Association of the eQTLs (and variants in linkage disequilibrium) with schizophrenia.

| HERV          | SNP        | Chromosome | Position  | Risk allele | Other allele | Frq cases | OR      | SE       | P       | R <sup>2</sup> ‡ | D' ‡ |
|---------------|------------|------------|-----------|-------------|--------------|-----------|---------|----------|---------|------------------|------|
| ERVLE_8q24.3h | rs4875048  | 8          | 144826671 | A           | G            | 0.1869    | 1.0553  | 0.011855 | 5.6E-06 | -                | -    |
|               | rs10552126 | 8          | 144844056 | CAT         | C            | 0.2018    | 1.05919 | 0.0116   | 7.1E-07 | 0.8954           | 1    |
| LTR25_6q21    | rs174399   | 6          | 111919619 | G*          | A            | 0.2565    | 1.0025  | 0.010488 | 0.81    | -                | -    |
|               | rs11153302 | 6          | 111918869 | A           | G            | 0.506     | 1.0397  | 0.00973  | 6.4E-05 | 0.38             | 1    |

\* This SNP is not associated with schizophrenia, but is in linkage disequilibrium with another variant that is associated with this disorder.

‡ Linkage disequilibrium statistics in relation to the top association signal at the locus which is in LD with the HERV-eQTL.
